# Supplementary material for: An analogue of the Prolactin Releasing Peptide reduces obesity and promotes adult neurogenesis
Source: Springer Nature journal article supplement (doi:10.1038/s44319-023-00016-2), 2023-12-20
Supplement: MOESM1 [file 44319_2023_16_MOESM1_ESM.pdf]

## Appendix Figures (Jorgensen et al., 2023): Table of Content

| Name               | Page | Description                                                             |
|--------------------|------|-------------------------------------------------------------------------|
| Appendix Figure S1 | 1    | LiPR does not affect astrogliogenesis in the MBH                        |
| Appendix Figure S2 | 2    | Additional RNAseq data and confirmation of RNAseq by RT-qPCR            |
| Appendix Figure S3 | 3    | Additional data from calcium imaging of hiPSC-derived hypothal. neurons |
| Appendix Figure 4S | 4    | A schematic of LiPR effects on hypothalamic adult neurogenesis          |

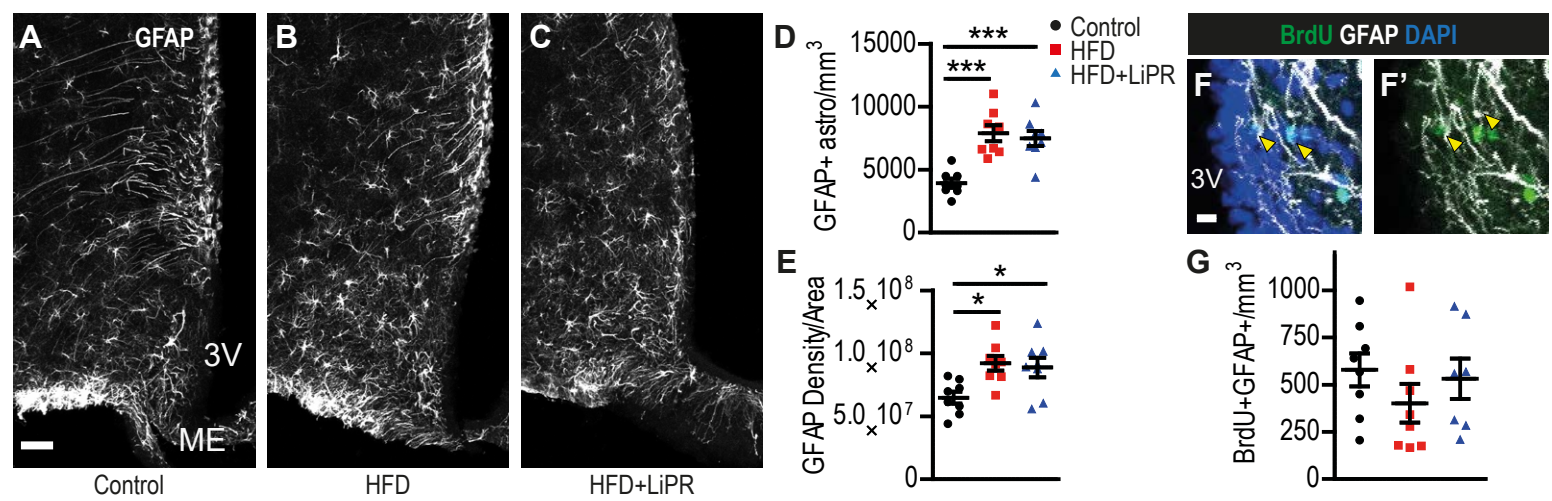

### Appendix Figure S1 – LiPR does not affect astroglialogenesis in the MBH

(A-C) Representative confocal images of HVZ stained for GFAP in Control (A), HFD (B) and HFD + LiPR (C) of 4mo HFD group.

(D-E) Quantification of GFAP+ astrocytes (D) and GFAP density (E) in MBH parenchyma of 4mo HFD group.

(F) Representative confocal image of BrdU+ astrocytes in MBH parenchyma.

(G) Quantification of BrdU+ astrocytes in MBH parenchyma.

Scale bars: 50  $\mu$ m (A-C), 20  $\mu$ m (F). n = 8.

Data information: One-Way ANOVA (panel D:  $F(2,21) = 16.22$ ,  $p < 0.0001$ ;

panel E:  $F(2,21) = 5.67$ ,  $p = 0.011$ ).

\* $p < 0.05$ , \*\*\* $p < 0.001$  (Bonferroni's test). Data are presented as mean  $\pm$  SEM.

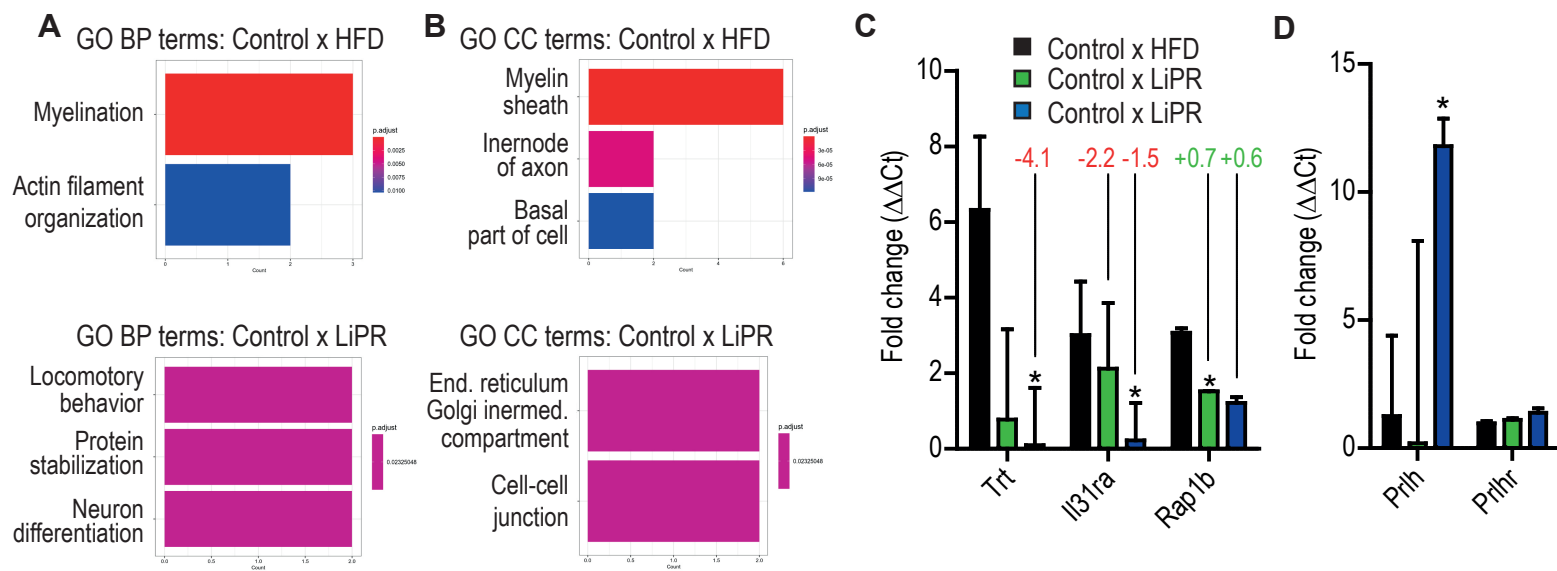

## Appendix Figure S2 – Additional RNAseq data and confirmation of RNAseq by RT-qPCR

(A) Bulk MBH RNAseq GO terms for Biological Processes (BP) for Control Diet vs HFD (top graph) and Control Diet vs Control Diet+LiPR (bottom graph).

(B) Bulk MBH RNAseq GO terms for Cell Compartments (CC).

(C) Relative mRNA fold change of *Trt*, *Il31ra* and *Rap1b* compared to *Gapdh* in cDNA used for the bulk RNAseq of the MBH. Numbers above the bar graphs represent expression change values for a given gene from the RNAseq data.

(D) Relative mRNA fold change of *Prlh* and *Prlhr* compared to *Gapdh* in cDNA used for the bulk RNAseq of the MBH. Data information: un-paired two-tailed T-Test, \* $p < 0.05$ . Data are presented as mean  $\pm$  SEM.

### hPrRP31 non-responsive neurons

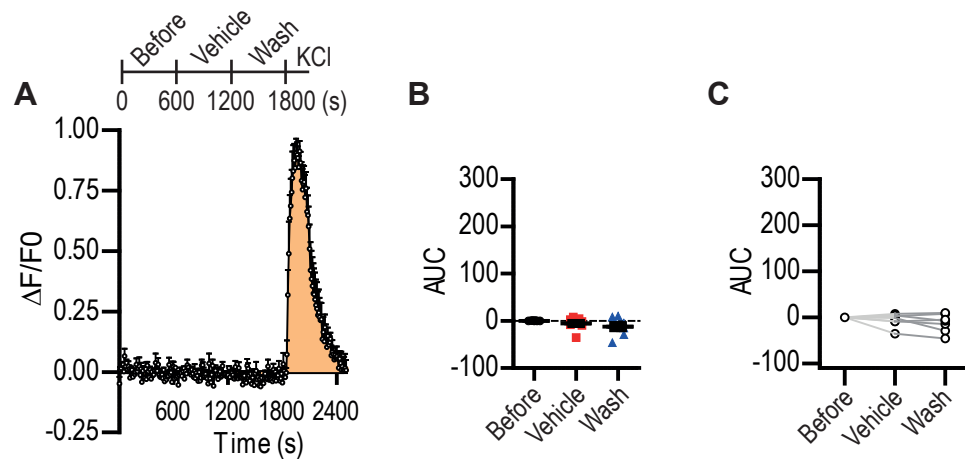

### All neurons exposed to hPrRP31

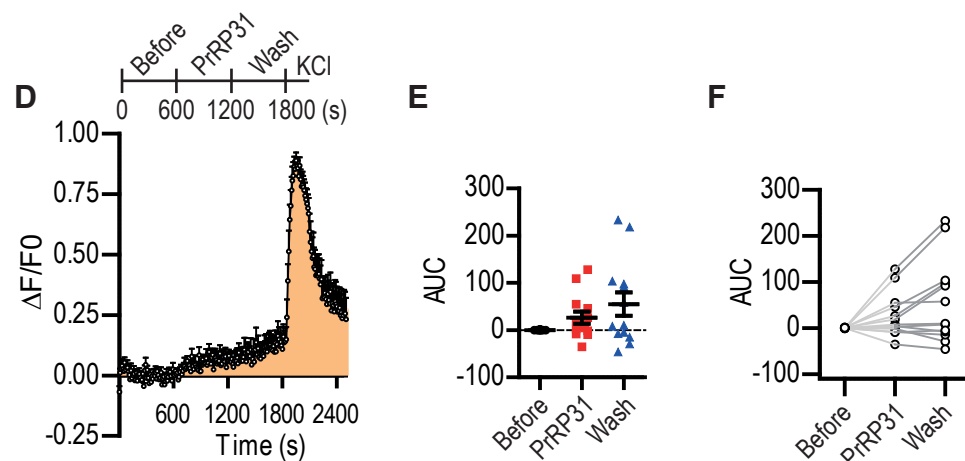

### Appendix Figure S3 – Additional data from calcium imaging of hiPSC-derived hypothalamic neurons

(A,D) A graph of the relative fluorescence change ( $\Delta F/F_0$ ) of Rhod-3 as a function of time before and during hPrRP31 application in medium, wash-out and KCl positive control in hiPSC-derived neurons non-responsive to hPrRP31 (A) and all neurons exposed to hPrRP31.

(B,E) A summary of fluorescence before (0-600 s), during hPrRP31 (600-1200 s) or wash-out (1200-1800 s) in Area Under Curve (AUC) for hPrRP31 non-responsive (B) and all neurons exposed to hPrRP31 (E).

(C,F) Individual neurons from calcium imaging in the before-after plot from the non-responsive (C) and all exposed neurons (F).

n = 7 for non-responsive, n = 13 all neurons. Data are presented as mean  $\pm$  SEM.

Short-term HFD

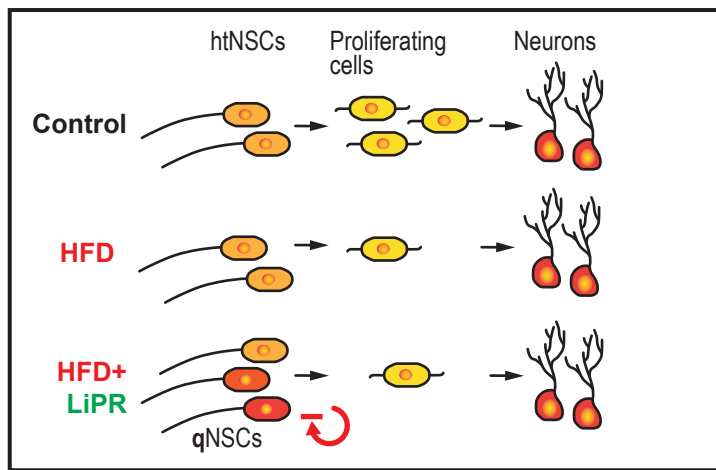

Long-term HFD

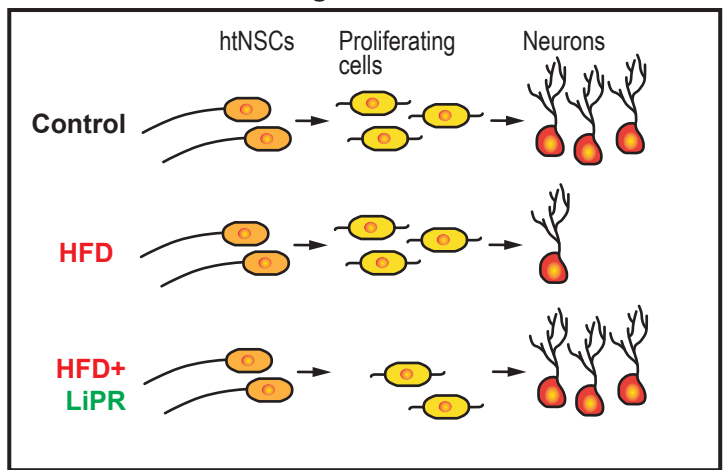

# **Appendix Figure S4 – A schematic of LiPR effects on hypothalamic adult neurogenesis**

(Left) LiPR decreases proliferation and activation of htNSCs during short and intermediate HFD protocols.  
 (Right) LiPR increases survival of new hypothalamic neurons during long-term HFD and obesity.
